# Supplementary material
Source: PubMed Central journal article supplement (PMC5604044)
Supplement: pnas.1712305114.sapp.pdf [file pnas.1712305114.sapp.pdf]

Supporting Information for:

**Top-down modulation of sensory cortex gates perceptual learning**

Melissa L. Caras<sup>a,1</sup>, Dan H. Sanes<sup>a,b,c</sup>

**This PDF file includes:**

Materials and Methods

Supplementary References

Figs. S1 to S14

Tables S1 to S4

## 1 **Materials and Methods**

### 2 Subjects

3 Adult Mongolian gerbils (*Meriones unguiculatus*) were raised from commercially obtained  
4 breeding pairs (Charles River). Animals were housed on a 12-h light/12-h dark cycle, and  
5 provided with *ad libitum* food and water unless otherwise noted. All procedures were approved  
6 by the Institutional Animal Care and Use Committee at New York University.

7

### 8 Behavioral Apparatus

9 Behavioral performance was assessed with a yes-no aversive conditioning paradigm, as  
10 described previously (1-5). Briefly, a stainless steel spout was positioned above a metal  
11 floorplate within a test cage. Water delivery was initiated by a syringe pump (NE-1000; New Era  
12 Pump Systems) triggered by infrared detection at the spout contact. Sound stimuli were delivered  
13 from a calibrated free-field speaker (DX25TG05-04; Vifa) positioned 1m in front of the test  
14 cage. The cage and speaker were housed within a sound-attenuating room (GretchKen), and  
15 monitored remotely. Stimulus delivery and data acquisition were controlled using custom Python  
16 scripts (written by Dr. Bradley Buran) and an RZ6 multifunction processor (Tucker Davis  
17 Technologies).

18

### 19 Associative Training

20 Animals were placed on controlled water access, and trained to drink continuously while in  
21 the presence of steady, unmodulated, broadband noise (60 dB SPL; 2.5-20 kHz; 12 dB/octave  
22 roll-off). Animals learned to withdraw from the spout when the sound changed from the “safe”  
23 cue (unmodulated noise) to the “warn” cue (0 dB re: 100% depth sinusoidal AM noise; 5 Hz

24 modulation rate; 1 s duration) by pairing the warn cue with a mild shock (0.5-1.0 mA, 300 ms;  
25 Lafayette Instruments) delivered through the metal lick spout (Fig. 1A). To be consistent with  
26 previous literature, and because the decision axis for AM detection is logarithmic (6), depths are  
27 presented here on a dB scale (re: 100% depth). Thus, 0 dB (re: 100% depth) refers to fully  
28 modulated (100% depth) noise, and negative numbers refer to shallower depths. These dB  
29 (re:100% depth) values are not to be confused with dB SPL values, which indicate the root-  
30 mean-squared intensity of the stimulus.

31 Individual animals vary in their sensitivity to pain (7); thus, the shock level was adjusted on  
32 a subject-by-subject basis to reliably elicit spout withdrawal, without dissuading the animal from  
33 resuming drinking shortly thereafter. Warn trials were interspersed with 3-5 safe trials, during  
34 which the unmodulated sound continued unchanged. The unpredictable nature of the warn  
35 presentation prevented temporal conditioning. The gain of the AM signal was adjusted to control  
36 for changes in average power across modulation depths (6, 8).

37

### 38 Behavioral Scoring

39 Behavioral responses were scored by monitoring the animal's contact with the spout during  
40 the final 100 msec of each trial. Breaking contact for  $\geq 50$  msec was considered a spout  
41 "withdrawal" and was scored as a correct "hit" on warn trials (AM noise), and as an incorrect  
42 "false alarm" on safe trials (unmodulated noise; Fig. 1A). Testing began only after an animal had  
43 reached a criterion level of behavioral performance ( $d' \geq 1.5$  for 0 dB depth; see Psychometric  
44 Analysis below). On the final day of associative training, and throughout testing, the root-mean-  
45 squared stimulus intensity was held constant at 45 dB SPL.

46

47 Psychometric Training and Testing

48 Each psychometric session began with a series of “reminder trials” at 0 dB depth. After the  
49 animal responded correctly to 3 consecutive reminder stimuli (or consumed 0.5 mL of water,  
50 whichever came first), psychometric assessment commenced. Five AM depths (Figs. S2-S3)  
51 were presented in descending order (interspersed with 3-5 safe trials, as described above).

52 Animals underwent perceptual training for 5-14 days. Sessions took place every 24 to 48  
53 hours. The five depths presented during the first psychometric session (0, -3, -6, -9 and -12 dB  
54 re: 100%) were chosen because they bracketed naive AM depth detection thresholds, as  
55 determined previously (2, 3, 5). The five AM depths presented in each subsequent session were  
56 determined by the animal’s performance on the previous day. Consecutive AM depths were  
57 always in increments of 3 dB.

58 Maintaining threshold bracketing within and across sessions made it likely that animals  
59 would fail to detect the smallest of the AM depths presented. Delivering shocks during such  
60 trials would likely lead to a cessation of drinking, or intermittent pecking at the spout, which  
61 would result in an excessively high false alarm rate. To avoid these possibilities, the shock was  
62 turned off for the lowest two depths presented. A previous study (9) validated the necessity of  
63 this approach, and confirmed that animals do not become conditioned to the presence or absence  
64 of the shock.

65

66 Psychometric Analysis

67 The percent of “yes” responses (spout withdrawals) was plotted as function of modulation  
68 depth. These psychometric functions were fit with a cumulative Gaussian using the maximum

69 likelihood procedure of the open-source package psignifit 4 for MATLAB (10). The formula  
70 for this function is as follows:

71

$$72 \quad \Psi(x, m, w, \gamma, \lambda) = \gamma + (1 - \gamma - \lambda)S(x; m, w) \quad (1)$$

73

74 where

75

$$76 \quad S(x; m, w) = \Phi\left(C \frac{(x - m)}{w}\right) \text{ and } C = \Phi^{-1}(0.95) - \Phi^{-1}(0.5) \quad (2)$$

77

78 Here,  $\Phi$  and  $\Phi^{-1}$  represent the cumulative standard normal distribution and its inverse,  $x$   
79 represents the modulation depth,  $m$  the threshold,  $\lambda$  the lapse rate,  $\gamma$  the false alarm rate, and  $w$   
80 the width of the interval over which  $S(x; m, w)$  rises from  $\gamma$  to  $\lambda$ .

81 Bayesian inference was used to obtain parameter estimates for a beta-binomial model; thus  
82 prior distributions were required for each parameter described above, as well as an additional  
83 parameter,  $\eta$ , which represents overdispersion. We used the default priors in Psignifit 4, which  
84 worked well for fitting our data. Thus, for  $m$  and  $w$ , uniform prior distributions were generated  
85 automatically from the  $x$  values in our dataset, and the prior distributions for  $\gamma$ ,  $\lambda$ , and  $\eta$  were  
86 defined as beta-distributions with the parameters (1,10) (10).

87 Fits were transformed to the signal detection metric  $d'$  (11):

88

$$89 \quad d' = Z(h) - Z(fa) \quad (3)$$

90

91 Here,  $h$  and  $fa$  represent the hit rate and false alarm rate, respectively. To avoid  $d'$  values that  
92 approach infinity, we set a floor (0.05) and ceiling (0.95) on hit rates and false alarm rates. For  
93 each psychometric fit, threshold was defined as the AM depth at which  $d' = 1$ , unless otherwise  
94 stated.

95

### 96 Electro Implantation Surgery

97 Animals ( $n = 4$  males) were anesthetized with isoflurane/O<sub>2</sub> and secured in a stereotaxic  
98 device (Kopf). An incision was made along the midline, and the skin and fascia were removed.  
99 The skull was exposed and dried with H<sub>2</sub>O<sub>2</sub>. Bone screws were inserted into both frontal bones  
100 and the right parietal bone. A craniotomy was made in the left parietal bone, dorsal and medial to  
101 auditory cortex. A 4 shank silicone probe array with 16 channels arranged in a 600 x 600  $\mu\text{m}$   
102 grid (A4x4-4mm-200-200-1250-H16\_21mm; NeuroNexus) was fixed to a custom-made  
103 microdrive to allow for subsequent advancement, and angled 25 degrees in the mediolateral  
104 plane. The rostral-most shank of the array was positioned 3.9 mm rostral and 4.8 mm lateral to  
105 lambda, and inserted into left core auditory cortex (Fig. S13). Left auditory cortex was targeted  
106 because of its sensitivity to time-varying signals, including vocalizations, relative to the right  
107 hemisphere (12-14). A ground wire was inserted in the right caudal hemisphere, and the  
108 apparatus was secured to the skull via dental acrylic. Animals were allowed to recover for at  
109 least 1 week before being placed on controlled water access.

110

### 111 Neurophysiology

112 Recordings were made in awake animals before, during, and after behavioral sessions using  
113 previously described methodology (15, 16). Briefly, extracellular single- and multi-unit activity

114 was acquired via a 15-channel wireless headstage and receiver (W16; Triangle BioSystems).  
115 Analog signals were preamplified, digitized at a 24.414 kHz sampling rate (TB32; Tucker Davis  
116 Technologies, TDT), and fed via fiber optic link to an RZ5 base station (TDT) for filtering and  
117 processing. To reduce noise, the recordings from all but one channel (e.g. channels 2-15) were  
118 averaged together and subtracted from the remaining channel (e.g. channel 1). This method of  
119 common average referencing was applied to each channel individually (17). Offline, signals were  
120 high-pass filtered (300 Hz; 48 dB/octave roll-off), and a representative 16 sec recording segment  
121 was used to estimate the standard deviation (SD) of the background noise, using the algorithm  
122 described by Quiroga and colleagues (18). A spike extraction threshold was set 4-5 SDs above  
123 the noise floor, and an artifact rejection threshold was set to 20 SDs. Extracted spike waveforms  
124 were peak-aligned, hierarchically clustered, and sorted in principal component (PC) space using  
125 the MATLAB-based package UltraMegaSort 2000 (19) (Fig. S14). Single-units were  
126 characterized by clear separation in PC space,  $\leq 10\%$  of spikes violating the refractory period,  
127 and  $\leq 5\%$  spikes missing, as estimated from a Gaussian fit of the spike amplitude histogram (19)  
128 (Fig. S14). Recordings that did not meet these criteria were considered multi-units. Because of  
129 the small number of AM-responsive single-units in our dataset (see Table S1), we pooled single-  
130 and multi-units together for all group analyses reported here.

131 During behavioral recording sessions, the number of trials per session was unlimited, and  
132 AM depth values were adjusted within each session to maintain threshold bracketing (5). This  
133 approach allowed us to maximize our neurophysiological data collection each day.

134 Recordings were made both during task performance (the “engaged” condition), and during  
135 disengaged sessions that occurred just prior to (“pre”) and just after (“post”) the engaged  
136 sessions. The number of presentations for each warn depth (averaged across sessions) was

137 similar across listening conditions [pre:  $16 \pm 0.22$ ; engaged:  $16 \pm 0.53$ ; post:  $15 \pm 0.24$ ; mean  $\pm$   
138 sem trials].

139

#### 140 Neurometric Analysis

141 The firing rate (spikes/s) of each recording site was calculated over a 1 second duration for  
142 both unmodulated and AM noise. Firing rate-based  $d'$  values were calculated as:

143

$$144 \quad d' = \frac{2(\mu FR_{AM} - \mu FR_{UNMOD})}{\sigma FR_{AM} + \sigma FR_{UNMOD}} \quad (4)$$

145

146 where  $\mu FR_{AM}$  and  $\sigma FR_{AM}$  are the mean and standard deviation of the firing rate for a single  
147 modulation depth, and  $\mu FR_{UNMOD}$  and  $\sigma FR_{UNMOD}$  represent the mean and standard deviation of  
148 the firing rate elicited by the unmodulated noise.

149 Neural  $d'$  values were fit with a logistic function using a nonlinear least-squares regression  
150 procedure using the MATLAB function *nlinfit* (Mathworks) (16). The formula for this function  
151 is as follows:

$$152 \quad F(x) = y_0 + \frac{a}{1 + \exp(-(x - x_0)/b)} \quad (5)$$

153

154 Here,  $y_0$  represents the minimum  $d'$  value,  $x$  the modulation depth,  $a$  the range of  $d'$  values,  
155  $x_0$  the modulation depth at the inflection point, and  $b$  the slope of the function. The validity of  
156 each fit was assessed by calculating the statistical significance of the correlation (Pearson's  $r$ )  
157 between predicted and actual  $d'$  values. For each neurometric fit, threshold was defined as the



158 AM depth at which  $d' = 1$ . Units were considered responsive to AM stimuli if they generated a  
159 valid neurometric fit and threshold. Units were considered unresponsive if either (i) the fit was  
160 deemed invalid, or (ii) the highest  $d'$  elicited was below a value of 1. For units with valid fits  
161 and a minimum  $d'$  value above 1, threshold was set to the lowest AM depth presented in the  
162 session.

163

#### 164 Cannula Implantation Surgery

165 Surgical procedures for cannula implantation were similar to those for electrode  
166 implantation, described above. After exposing and drying the skull, bone screws were inserted  
167 into both frontal bones. Craniotomies were made in the both parietal bones, dorsal and medial to  
168 each auditory cortex. Double guide cannula (26 gauge, 3 mm cannula length, 1.2 mm center-to-  
169 center distance; C235GS-5-1.2/SPC; Plastics One) were angled 20 degrees in the mediolateral  
170 plane. The mediolateral angle of electrodes and cannulas differed because the size of the  
171 cannulas prevented bilateral implants angled at 25 degrees. However, histology confirmed that  
172 our infusions were centered within ACx (Fig. S9). The rostral most cannula in each hemisphere  
173 was positioned 3.9 mm rostral and 4.8 mm lateral to lambda. Cannulas were inserted into left and  
174 right core auditory cortices, and the apparatus was secured to the skull via dental acrylic.  
175 Dummy cannulas (33 gauge, 3.2 mm cannula length, C235DCS-5/SP; Plastics One) were  
176 inserted to keep guides clear and were secured in place with a brass dustcap (303DC/1B; Plastics  
177 One). Animals were allowed to recover for at least 1 week before being placed on controlled  
178 water access.

179

#### 180 Cannula Infusions

181 Muscimol (AbCam) was dissolved in 0.9% NaCl to achieve a concentration of 4 mg/mL.  
182 Aliquots (20-30  $\mu$ L) were stored at -20°C and used within 1 week. Prior to infusions, aliquots  
183 were thawed to room temperature and diluted to 1 (Fig. S1) or 0.5 mg/mL (Fig. 4 and Fig. S11-  
184 12) with 0.9% NaCl.

185 Animals ( $n = 7$  males) were anesthetized with isoflurane/O<sub>2</sub>. Dust caps and dummy cannulas  
186 were removed from the guides. Infusion cannulas (33 gauge, 4 mm cannula length, C235IS-5/SP;  
187 Plastics One) were connected to PE-50 tubing (A-M Systems), backfilled with mineral oil, and  
188 connected to glass syringes (10  $\mu$ L, 1801 Gastight, Hamilton) via 23s gauge needles (Hamilton).  
189 Muscimol or saline was drawn into the tip of each infusion cannula, and inserted into the guides.  
190 Bilateral infusions (1  $\mu$ L/hemisphere, 0.2  $\mu$ L/min) were made simultaneously using a six-channel  
191 programmable pump (NE-1600, New Era). Infusion success was confirmed by visually  
192 monitoring the movement of the meniscus between the infusion solution (muscimol or saline)  
193 and the mineral oil. To ensure full diffusion of the solution, infusion cannulas were left in place  
194 for 4 minutes before replacing dummy cannulas and caps. The entire process (from anesthesia  
195 induction to cap replacement) took 10-12 minutes. Animals recovered in their home cage for 45  
196 minutes prior to behavioral training or testing. During this time, we observed animals to verify  
197 that they were alert and engaged, displayed proper posture, and demonstrated normal motor  
198 functions. One of the seven animals did not meet these criteria, and was therefore removed from  
199 the study. This animal was the smallest of the infusion group (55.5 gm), weighing >1.5 standard  
200 deviations below the mean of the remaining animals (69.5 +/- 8.7 gm).

201 The 6 remaining animals were used to determine whether ACx activity is necessary for PL  
202 (Fig. 4A-D and Fig. S11). Four of these animals were also used to determine whether ACx is  
203 necessary for detection of fully modulated AM noise (Fig. S1 and Fig. S10). These latter

204 experiments took place immediately after associative training was completed, prior to any  
205 psychometric training or testing.

206 When determining whether ACx was required for AM depth detection (Fig. S1), the warn  
207 stimulus (0 dB re: 100% depth) was presented a maximum of 20 times per session. During  
208 experiments exploring whether ACx activity is necessary for PL (Fig. 4, Figs. S11-S12), each  
209 depth was presented a maximum of 10 times. Given enough time or practice, animals with  
210 inactivated or lesioned brain regions may develop compensatory neural strategies to solve  
211 perceptual tasks (20, 21). In pilot experiments, we found that limiting sessions to 50 total trials  
212 minimizes compensation (not shown).

213

#### 214 Histology

215 At the end of all experiments, animals were deeply anesthetized with an intraperitoneal  
216 injection of sodium pentobarbital (150 mg/kg) and perfused with phosphate-buffered saline and  
217 4% paraformaldehyde. To mark recording sites in electrode-implanted animals, electrolytic  
218 lesions were made by passing current (7 mA, 10 sec) through one contact immediately before  
219 perfusion. To estimate the spread of muscimol diffusion in cannula-implanted animals, animals  
220 were infused with Fluoro-Ruby (10,000 MW Tetramethylrhodamine dextran, Thermo Fisher;  
221 1 $\mu$ L /hemisphere) 30 – 90 minutes before perfusion. Brains were post-fixed and sectioned at 60  
222  $\mu$ m on a benchtop vibratome (Leica). Alternate sections from cannula-implanted animals were  
223 cleared and coverslipped for fluorescent imaging. All other sections were stained for Nissl.  
224 Brightfield and fluorescent images were acquired at 2X and 10X using a high-resolution slide  
225 scanner (Olympus). To verify recordings and infusions targeted core auditory cortex, electrode

226 tracks (Fig. S13) and dye spread (Fig. S9) were reconstructed offline and compared to a gerbil  
227 brain atlas (22).

228

## 229 Statistical Analysis

230 Statistical analyses were performed using JMP 9.0.1 (SAS), PASW Statistics 18.0, or SPSS  
231 Statistics 24.0. For normally distributed data (as assessed by the Shapiro-Wilk test), data are  
232 reported as mean  $\pm$  sem unless otherwise stated. When data were not normally distributed, non-  
233 parametric analyses were used. In instances of multiple comparisons, alpha values were Holm-  
234 Bonferroni-corrected. When violations of sphericity were present,  $P$  values and degrees of  
235 freedom were Greenhouse-Geisser corrected.

236 For our physiology experiments, animals received perceptual training for either 5, 7, 10, or  
237 14 days (each  $n = 1$ ). We therefore restricted our group analyses to the first 7 days of training for  
238 which we had data from  $n = 3$  animals. When performing within-subject analyses (such as in Fig.  
239 1F-G, Fig. 3D-E, and Fig. S5), we used all data available. To quantify the correlation between  
240 neural and behavioral thresholds within individual animals (Fig. 1G, Fig. 3E and Table S2), we  
241 calculated Pearson's  $r$  and its associated  $P$  value.

242 The electrode position within each animal was advanced or kept steady based on the quality  
243 and number of AM-responsive recording sites on a given day. As a result of this approach, some  
244 sites were recorded over multiple training days, and other sites were only recorded on a single  
245 day. Thus, to quantify the overall effect of training on neural thresholds we chose to treat each  
246 recording site independently. We therefore used standard 1-way (non repeated-measures, RM)  
247 ANOVAs to analyze the neural data depicted in Fig. 1H, Fig 3F, Fig. S5 and Fig. S8.

248 To assess the effect of training on behavioral thresholds and false alarm rates (Fig. 1H and  
249 Fig. S4B), we performed two tests. First, missing values from one animal on days 6 and 7  
250 prevented us from performing RM-ANOVAs for all 7 training days; thus, we performed 1-way  
251 RM-ANOVAs across only the first 5 days. Second, we performed less sensitive 1-way (non RM)  
252 ANOVAs for all 7 days of testing. As similar effects of training day were found for both tests,  
253 we only report the values for the RM-ANOVAs.

254 Similarly, because AM depths were systematically adjusted to maintain threshold  
255 bracketing (see Psychometric Training and Testing, above) some AM depth values were not  
256 presented on every test day. These missing values prevented us from performing RM-ANOVAs  
257 to test the effect of test day on hit rates (Fig. S4A). We therefore performed 1-way (non RM)  
258 ANOVAs for each stimulus value.

259 To calculate the rate of neural and behavioral improvement, we plotted data on an  $x$ -log  
260 scale, and fit data with a linear regression using the MATLAB functions *polyfit* and *polyval*. The  
261 slopes of these lines were taken as our measure of rate of improvement (Fig. 1H and Fig 3F).

262 To compare thresholds across days within individual units (Fig. 1I and Table S3), we used  
263 Student's paired two-tailed  $t$ -tests.

264 Because FRs were non-normally distributed, we used Kruskal-Wallis tests to analyze the  
265 effect of perceptual training on FR (Fig. S6A), FR standard deviations (Fig. S6B), FR ratios (Fig.  
266 2B), and CV (Fig. 2C). We used the Friedman test and Wilcoxon Signed Ranks tests to compare  
267 firing rates across listening conditions (Fig. 3C).

268 We used a 1-way RM-ANOVA and Student's paired two-tailed  $t$ -tests to compare neural  
269 thresholds between disengaged (pre and post) and engaged listening conditions (Fig. 3B).

270 To examine the effect of a high dose of muscimol on detection of fully modulated (0 dB re:  
271 100% depth) noise (Fig. S1), we used a 1-way RM-ANOVA. Post-hoc comparisons were  
272 performed with Student's paired two-tailed *t*-tests. To determine whether the effect of muscimol  
273 on 0 dB AM detection was dose-dependent (Fig. S10), we performed Student's paired two-tailed  
274 *t*-tests.

275 To determine whether a low dose of muscimol affected psychometric performance during  
276 training (Fig. S11), we performed a 2-way (stimulus x condition) RM-ANOVA. To determine  
277 whether muscimol infusions impaired PL, we examined the effect of time point (baseline, day 7,  
278 final) on behavioral *d'* values (Fig. 4C and 4E). Because we maintained threshold bracketing (see  
279 Psychometric Training and Testing, above), some AM depth values were not presented at every  
280 time point. We took two approaches to analyze data with missing values. First, we created  
281 restricted datasets by removing any AM depth value for which we had missing data. Second, we  
282 created complete datasets by filling in missing points with *d'* values extrapolated from the  
283 psychometric fitted functions. We then analyzed both the restricted and complete datasets using  
284 2-way (time point x AM depth) RM-ANOVAs. Because these analyses yielded qualitatively  
285 similar results, we report only the test-statistics and *P* values from the analysis of the complete  
286 datasets here. We also used 2-way RM-ANOVAs to determine the effect of time point on  
287 thresholds obtained at 4 different *d'* cuts (1, 1.5, 2 and 2.5; Fig 4D and 4F).

288 To verify that muscimol-induced disruptions of PL were not due to task-specific  
289 impairments (such as reduced motivation or disrupted motor function) we examined the effect of  
290 ACx infusions on the rate of trial completion, false alarm rates, and reaction times using 1-way  
291 RM-ANOVAs (Fig. S12).

## References

1. Heffner HE, and Heffner RS (1995) in *Methods in comparative psychoacoustics*, editor Klump GM, Dooling RJ, Fay RR, and Stebbins WC (Springer, Basel, Switzerland), p 79-93.
2. Sarro EC, and Sanes DH (2010) Prolonged maturation of auditory perception and learning in gerbils. *Dev Neurobiol* 70:636-48.
3. Sarro EC, and Sanes DH (2011) The cost and benefit of juvenile training on adult perceptual skill. *J Neurosci* 31:5383-91.
4. Sarro EC, von Trapp G, Mowery TM, Kotak VC, and Sanes DH (2015) Cortical Synaptic Inhibition Declines during Auditory Learning. *J Neurosci* 35:6318-25.
5. Caras ML, and Sanes DH (2015) Sustained Perceptual Deficits from Transient Sensory Deprivation. *Journal of Neuroscience* 35:10831-10842.
6. Wakefield GH, and Viemeister NF (1990) Discrimination of modulation depth of sinusoidal amplitude modulation (SAM) noise. *J Acoust Soc Am* 88:1367-73.
7. Mogil JS (1999) The genetic mediation of individual differences in sensitivity to pain and its inhibition. *Proc Natl Acad Sci U S A* 96:7744-51.
8. Viemeister NF (1979) Temporal modulation transfer functions based upon modulation thresholds. *J Acoust Soc Am* 66:1364-80.
9. Buran BN, Sarro EC, Manno FA, Kang R, Caras ML, and Sanes DH (2014) A sensitive period for the impact of hearing loss on auditory perception. *J Neurosci* 34:2276-84.

10. Schütt HH, Harmeling S, Macke JH, and Wichmann FA (2016) Painfree and accurate Bayesian estimation of psychometric functions for (potentially) overdispersed data. *Vision Res* 122:105-23.
11. Green DM, and Swets JA (1966) *Signal Detection Theory and Psychophysics* (Wiley, New York).
12. Heffner HE, and Heffner RS (1984) Temporal lobe lesions and perception of species-specific vocalizations by macaques. *Science* 226:75-6.
13. Jamison HL, Watkins KE, Bishop DV, and Matthews PM (2006) Hemispheric specialization for processing auditory nonspeech stimuli. *Cereb Cortex* 16:1266-75.
14. Wetzel W, Ohl FW, and Scheich H (2008) Global versus local processing of frequency-modulated tones in gerbils: an animal model of lateralized auditory cortex functions. *Proc Natl Acad Sci U S A* 105:6753-8.
15. Buran BN, von Trapp G, and Sanes DH (2014) Behaviorally gated reduction of spontaneous discharge can improve detection thresholds in auditory cortex. *J Neurosci* 34:4076-81.
16. von Trapp G, Buran BN, Sen K, Semple MN, and Sanes DH (2016) A Decline in Response Variability Improves Neural Signal Detection during Auditory Task Performance. *J Neurosci* 36:11097-11106.
17. Ludwig KA, Miriani RM, Langhals NB, Joseph MD, Anderson DJ, and Kipke DR (2009) Using a common average reference to improve cortical neuron recordings from microelectrode arrays. *J Neurophysiol* 101:1679-89.
18. Quiroga RQ, Nadasdy Z, and Ben-Shaul Y (2004) Unsupervised spike detection and sorting with wavelets and superparamagnetic clustering. *Neural Comput* 16:1661-87.



19. Hill DN, Mehta SB, and Kleinfeld D (2011) Quality metrics to accompany spike sorting of extracellular signals. *J Neurosci* 31:8699-705.
20. Depner M, Tziridis K, Hess A, and Schulze H (2014) Sensory cortex lesion triggers compensatory neuronal plasticity. *BMC Neurosci* 15:57.
21. Kato HK, Gillet SN, and Isaacson JS (2015) Flexible Sensory Representations in Auditory Cortex Driven by Behavioral Relevance. *Neuron* 88:1027-39.
22. Radtke-Schuller S, Schuller G, Angenstein F, Grosser OS, Goldschmidt J, and Budinger E (2016) Brain atlas of the Mongolian gerbil (*Meriones unguiculatus*) in CT/MRI-aided stereotaxic coordinates. *Brain Struct Funct* 221 Suppl 1:1-272.
23. Fritz J, Shamma S, Elhilali M, and Klein D (2003) Rapid task-related plasticity of spectrotemporal receptive fields in primary auditory cortex. *Nat Neurosci* 6:1216-23.
24. Fritz JB, Elhilali M, and Shamma SA (2005) Differential dynamic plasticity of A1 receptive fields during multiple spectral tasks. *J Neurosci* 25:7623-35.
25. Fritz JB, Elhilali M, and Shamma SA (2007) Adaptive changes in cortical receptive fields induced by attention to complex sounds. *J Neurophysiol* 98:2337-46.
26. McGinley MJ, Vinck M, Reimer J, Batista-Brito R, Zaghera E, Cadwell CR, Tolias AS, Cardin JA, and McCormick DA (2015) Waking State: Rapid Variations Modulate Neural and Behavioral Responses. *Neuron* 87:1143-61.
27. Goris RL, Movshon JA, and Simoncelli EP (2014) Partitioning neuronal variability. *Nat Neurosci* 17:858-65.
28. Kleinfeld D, Sachdev RN, Merchant LM, Jarvis MR, and Ebner FF (2002) Adaptive filtering of vibrissa input in motor cortex of rat. *Neuron* 34:1021-34.

29. Rosen MJ, Semple MN, and Sanes DH (2010) Exploiting development to evaluate auditory encoding of amplitude modulation. *J Neurosci* 30:15509-20.

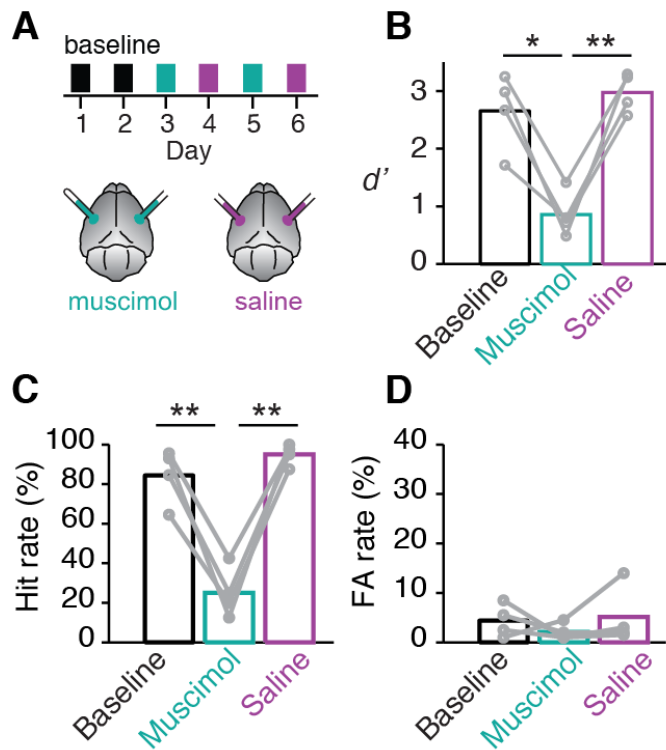

292 **Fig. S1. Auditory cortex activity is necessary for AM detection**

293 (A) Animals ( $n = 4$ ) were implanted with cannulas into bilateral auditory cortex, and tested on  
 294 their ability to detect fully modulated (0 dB re: 100%) AM noise using the task schematized in  
 295 Fig. 1A. (Note that these animals were not implanted with chronic electrode arrays for wireless  
 296 recording.) After 2 days of baseline testing, animals received bilateral infusions  
 297 (1 $\mu$ L/hemisphere) of either a high dose of muscimol (1mg/mL; total dose of 2  $\mu$ g) or saline on  
 298 alternate days. (B) Muscimol impairs AM detection [ $F_{2,6} = 33$ ,  $P = 0.0006$ ,  $n = 4$ ; muscimol vs.  
 299 baseline:  $t_3 = 5.6$ ,  $P = 0.012$ ; muscimol vs. saline:  $t_3 = 9.2$ ,  $P = 0.0027$ ]. Each point represents the  
 300 average of two test days. Data from the same animal are connected by lines. Bars represent  
 301 means. (C) Impairments were caused by reduced hit rates [ $F_{2,6} = 69$ ,  $P < 0.0001$ ; muscimol vs.  
 302 baseline:  $t_3 = 7.7$ ,  $P = 0.0045$ ; muscimol vs. saline:  $t_3 = 10$ ,  $P = 0.0019$ ]. (D) Muscimol does not  
 303 affect false alarm rates [ $F_{2,6} = 0.50$ ,  $P = 0.63$ ].

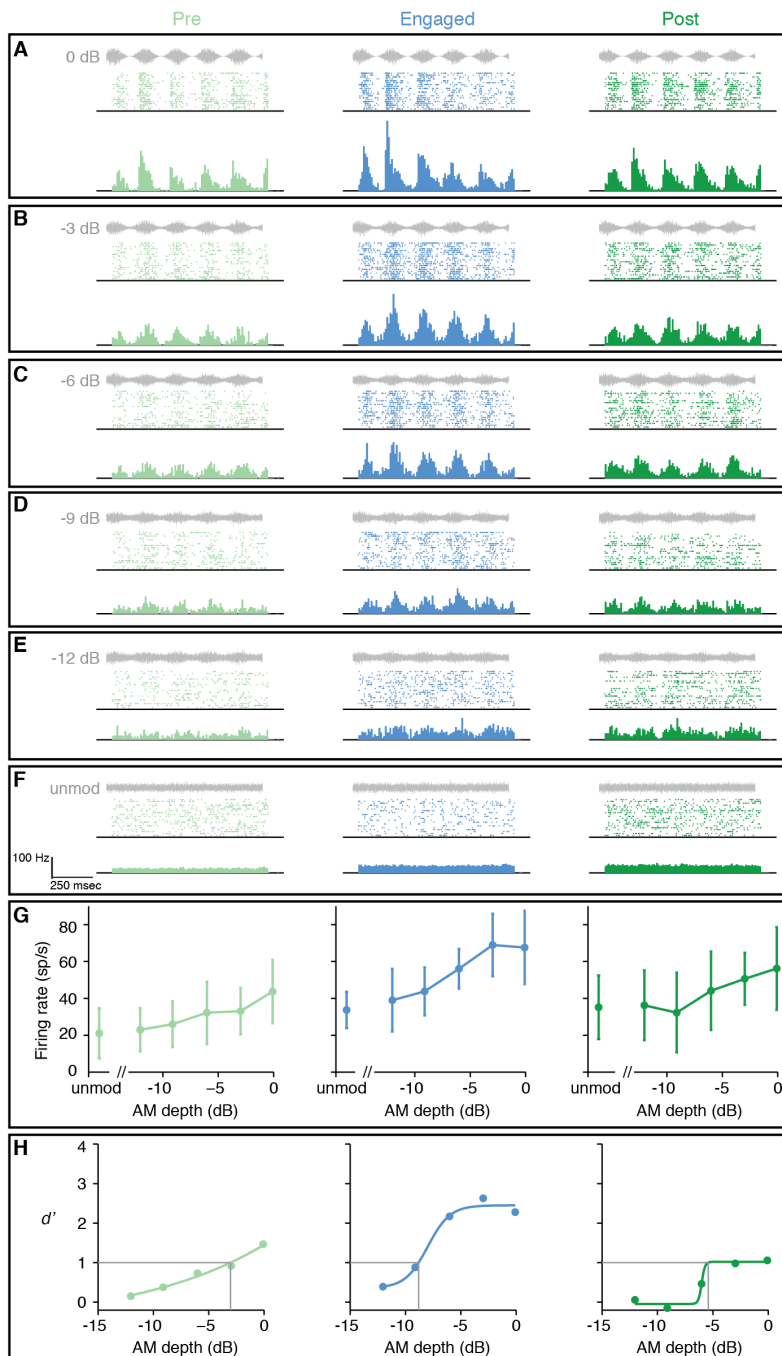

304 **Fig S2. AM-driven activity is enhanced during task-engagement**

305 (A-F) Rasters and post-stimulus time histograms (PSTHs) show AM-driven activity from one  
 306 representative multi-unit in response to a range of AM depth stimuli. Responses were recorded  
 307 on the first day of perceptual training. Grey waveforms show envelope of AM stimulus. Data are

308 from the same unit depicted in Fig. 3A. **(G)** The firing rate of this unit (mean  $\pm$  stdev) is plotted  
309 as a function of AM depth. **(H)** The firing rate of this unit is transformed into the signal  
310 detection metric,  $d'$ , and plotted as a function of AM depth. Despite yielding valid thresholds  
311 during pre, engaged, and post conditions (grey lines in **H**), AM-driven activity in this unit is  
312 stronger during the engaged condition compared to the disengaged (pre and post) conditions,  
313 leading to enhanced sensitivity during task-engagement. Increased discharge rates and enhanced  
314 AM sensitivity appear to persist to some degree after task-engagement. A similar trend can be  
315 observed for the group data in Fig. 3F. This observation is consistent with previous reports of  
316 task-related ACx plasticity being maintained for hours after task completion (23-25).

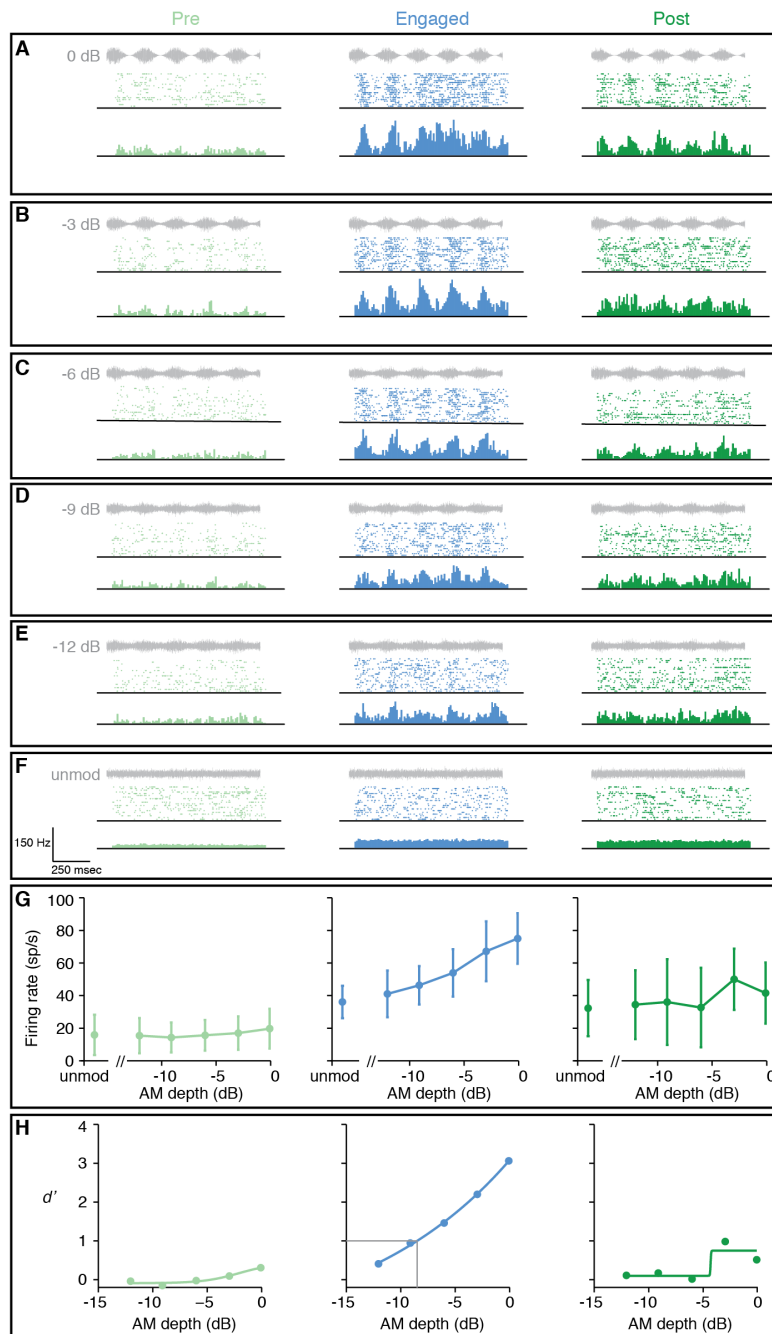

317 **Fig S3. AM-driven activity is enhanced during task-engagement**

318 Rasters and PSTHs (A-F), firing rates (G) and  $d'$  values (H) from another representative multi-  
 319 unit from the first day of perceptual training. Plot conventions as in Fig. S2. This unit only  
 320 yielded a valid threshold during task-engagement, and was therefore considered “unresponsive”  
 321 to AM during pre and post conditions.

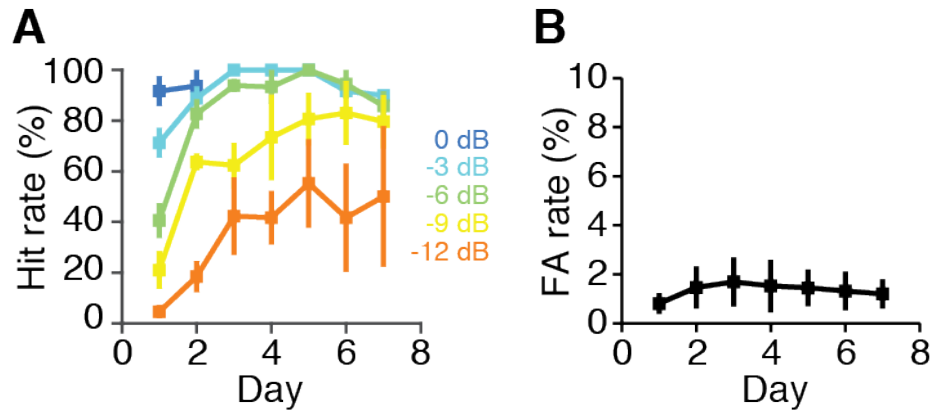

**Fig. S4 Behavioral improvement is driven by increased hit rates**

322 (A) Perceptual training increases hit rates [-3dB:  $F_{6,10} = 5.3$ ,  $P = 0.011$ ,  $n = 4$  (days 1-3), 2 (day  
 323 4) and 1 (days 5-7); -6 dB:  $F_{6,17} = 17.2$ ,  $P < 0.0001$ ,  $n = 4$  (days 1-3 and 5), 3 (days 4 and 6), 2  
 324 (day 7) ; -9 dB:  $F_{6,19} = 4.2$ ,  $P = 0.0075$ ,  $n = 4$  (days 1-5), 3 (days 6-7); -12 dB:  $F_{6,19} = 1.55$ ,  $P =$   
 325 0.22;  $n = 4$  (days 1-5), 3 (days 6-7)]. Note that because AM depths were systematically  
 326 decreased to maintain threshold bracketing, 0 dB was only presented on the first two days.  
 327 Therefore, no statistical test was performed for this stimulus value. (B) False alarm rates remain  
 328 low throughout training [ $F_{4,12} = 0.28$ ,  $P = 0.88$ ;  $n = 4$  animals].

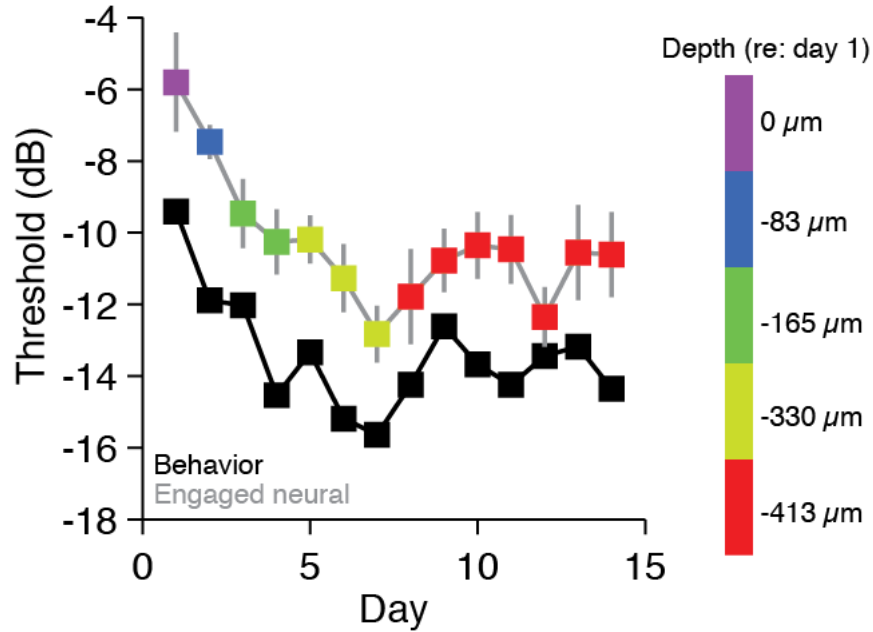

329 **Fig. S5 Neural improvement is maintained after learning**

330 Neural and behavioral sensitivity from one animal across 2 weeks of perceptual training. Neural  
 331 thresholds improve during the first 7 days of training [Days 1-7:  $F_{6,42} = 6.0$ ,  $P = 0.0001$ ,  $n = 49$   
 332 sites (range: 6-9/day)], and remain low during asymptotic perceptual performance [Days 7-14:  
 333  $F_{7,42} = 0.81$ ,  $P = 0.58$ ,  $n = 50$  sites (range 4-8/day)]. Color indicates depth at which physiological  
 334 data were recorded, relative to the starting depth on day 1. See Fig. S13 for histology from this  
 335 same animal.



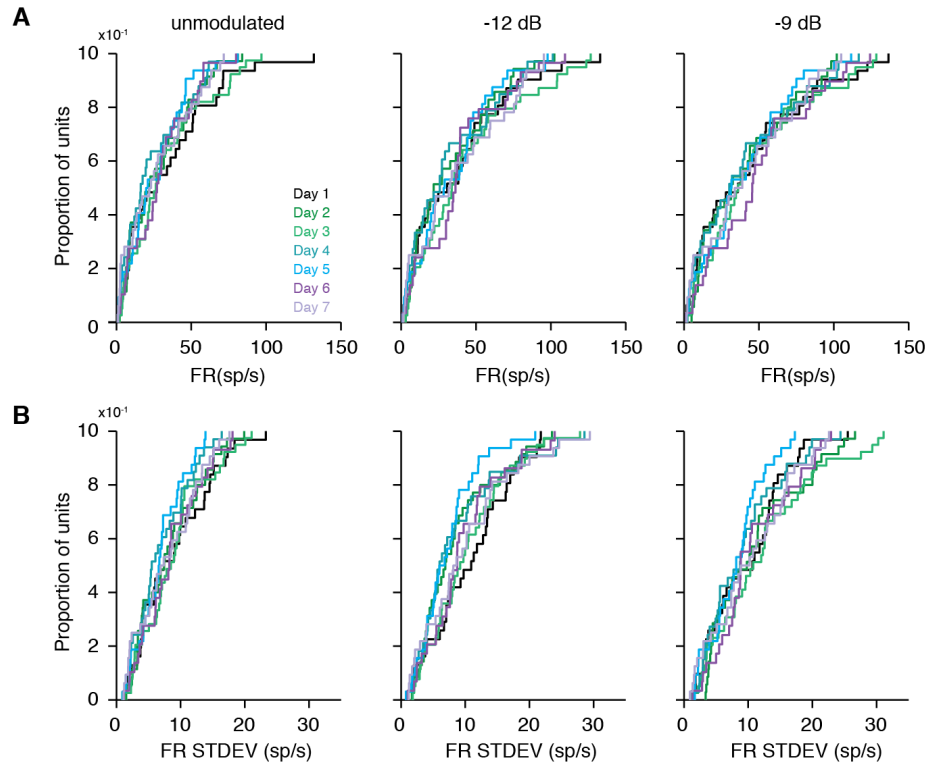

336 **Fig. S6 Perceptual training does not affect FRs or FR STDEVs across the ACx population**

337 **(A)** Population FRs do not change across training day [unmodulated:  $H = 2.90$ ,  $P = 0.821$ ; -12  
 338 dB:  $H = 2.52$ ,  $P = 0.866$ ; -9 dB:  $H = 2.22$ ,  $P = 0.899$ ]. **(B)** FR standard deviations also stay  
 339 steady during training [unmodulated:  $H = 4.58$ ,  $P = 0.599$ ; -12 dB:  $H = 7.82$ ,  $P = 0.252$ ; -9 dB:  $H$   
 340  $= 5.52$ ,  $P = 0.479$ ]. All  $n = 231$  sites (range: 29-39/day; Table S1). The fact that the FR ratios of  
 341 individual units increase throughout training (Fig. 2B) without a change in the global FR  
 342 suggests that the day-to-day FR changes of individual units offset one another. As an example, in  
 343 Fig. 2A, the FR distributions gradually separate from one another, but the day-to-day absolute  
 344 FRs fluctuate in a seemingly random manner (i.e. compare where the Day 2 and Day 4  
 345 distributions fall along the  $x$ -axis in Fig. 2A). This finding suggests that two independent  
 346 mechanisms simultaneously modulate FRs: one mechanism, induced by perceptual training,

347 enhances AM detection by increasing the separation of the warn and safe FR distributions. The  
348 second mechanism changes the daily FR gain on a unit-by-unit basis, in a stimulus-independent  
349 manner, possibly due to fluctuations in arousal, attention, or motivation (26, 27).

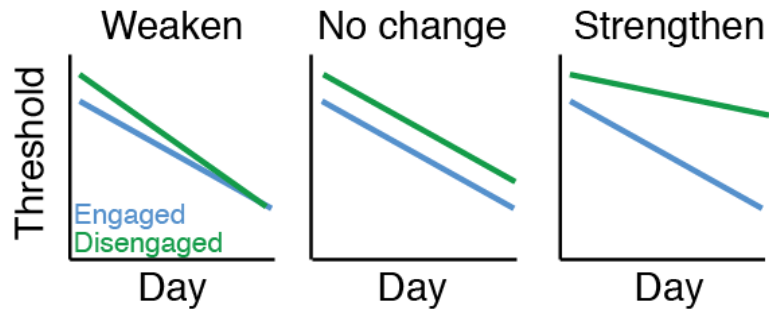

350 **Fig. S7 Possible effects of training on a top-down process**

351 The difference between engaged and disengaged neural thresholds reflects the strength of a top-  
 352 down process. If training has no effect on this process, we would expect the magnitude of the  
 353 engaged-disengaged difference to stay the same across days, despite training-based improvement  
 354 (middle panel). Alternatively, if training weakens the top-down process, we would expect that  
 355 the engaged-disengaged difference would gradually decrease across days (left panel). Finally, if  
 356 training strengthens the top-down process, we would expect the engaged-disengaged difference  
 357 to grow larger across days (right panel).

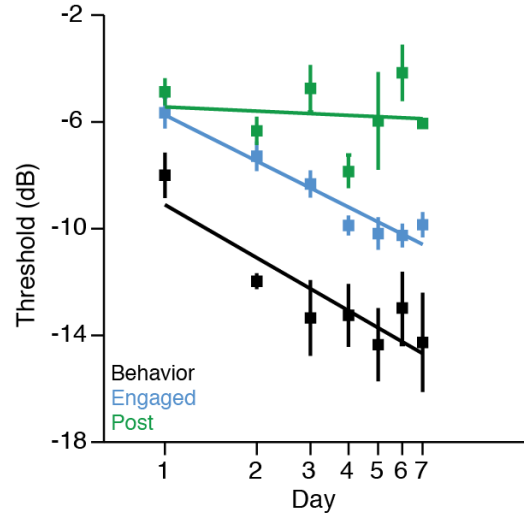

358 **Fig S8. Behaviorally-gated neural improvement is observed using a timing-based analysis**

359 Power was calculated from a discrete Fourier transform of spike times using a multitaper method  
 360 using the Chronux toolbox for MATLAB (28, 29). This approach quantifies the magnitude of the  
 361 discharge rate at the modulation rate of the AM stimulus (spikes/sec<sup>2</sup>/Hz). As power includes  
 362 both temporal and rate information in its calculation, but does not depend on stimulus phase-  
 363 locking, it is a reasonable indicator of how well neural activity matches the shape of the stimulus  
 364 amplitude envelope. Power values were transformed to  $d'$ , fit with a logistic regression, and  
 365 thresholds were extracted from the fitted functions at  $d' = 1$ . Power-based thresholds obtained  
 366 during task-engagement improved throughout perceptual training [ $F_{6,171} = 10.9$ ,  $P < 0.0001$ ,  $n =$   
 367 178 sites (range 22-31/day); -5.7 dB/log(day)]. Power-based thresholds obtained during  
 368 disengaged listening sessions immediately following task performance (“post”) did not improve  
 369 [ $F_{6,14} = 2.40$ ,  $P = 0.083$ ,  $n = 21$  sites (range 1-6/day); -0.52 dB/log(day)]. Note that the effect of  
 370 training could not be assessed on thresholds from disengaged listening sessions that occurred  
 371 immediately prior to task performance (“pre”) because only 2 training days yielded power-  
 372 based thresholds from more than one site.

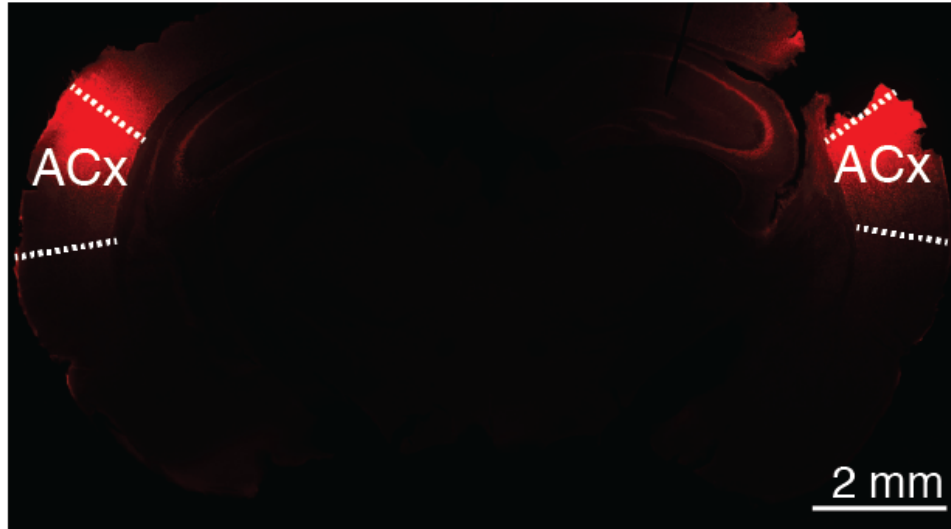

373 **Fig. S9 Estimated spread of muscimol**

374 Representative coronal section shows spread of Fluro-Ruby (1  $\mu\text{L}$ /hemisphere) 45 minutes after

375 bilateral ACx infusion.

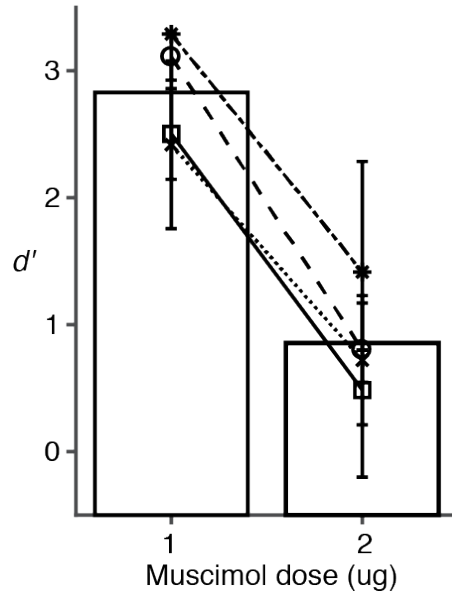

376

377 **Fig S10. Dose-dependent effect of muscimol on AM detection**

378 A high dose of muscimol (1  $\mu$ L/hemisphere; 1 mg/mL; total dose of 2  $\mu$ g) impairs detection of  
 379 fully modulated (0 dB re: 100%) AM noise. A lower dose (1  $\mu$ L/hemisphere; 0.5 mg/mL; total  
 380 dose of 1  $\mu$ g) allows for excellent detection of 0 dB AM in the same animals ( $n = 4$ ). Data from  
 381 the same animal are connected by lines. The effect of dose was significant [ $t_3 = 15.29$ ,  $P =$   
 382 0.0006,  $n=4$  animals]. Bars represent means. High dose (2  $\mu$ g) data are replotted from Fig. S1,  
 383 with each point representing the average of two muscimol sessions collected during associative  
 384 testing (prior to perceptual training) on alternating days. Low dose (1  $\mu$ g) data points represent  
 385 the average of all  $d'$  values generated at 0 dB during perceptual training sessions paired with  
 386 muscimol (i.e. Days 2-6 in Fig. 4A). Because AM depth values were adjusted daily to maintain  
 387 threshold bracketing during perceptual training, animals were tested with 0 dB for a variable  
 388 number of low-dose sessions (range: 2-4).

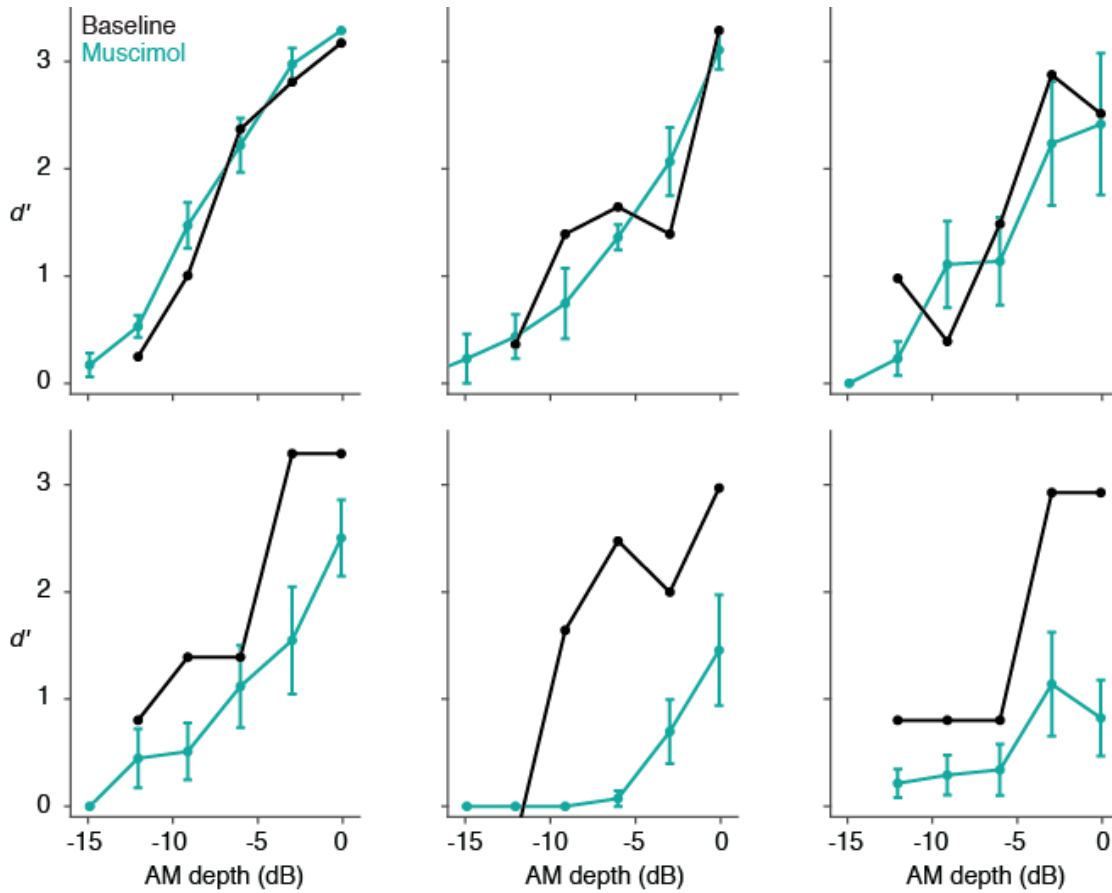

389

390 **Fig S11. A low dose of muscimol does not grossly impair psychometric performance**

391 Comparisons of psychometric performance at baseline and during muscimol training sessions.

392 Each panel contains data from a single animal. Muscimol data are averaged across all muscimol

393 training sessions (Days 2-6 in Fig. 4A). In general, a low dose of muscimol (0.5 mg/mL;

394 1 $\mu$ L/hemisphere; total dose of 1  $\mu$ g) did not grossly perturb AM perception [ $F_{1,5} = 5.14, P =$

395 0.073,  $n = 6$  animals], but did impair learning (see Fig. 4).

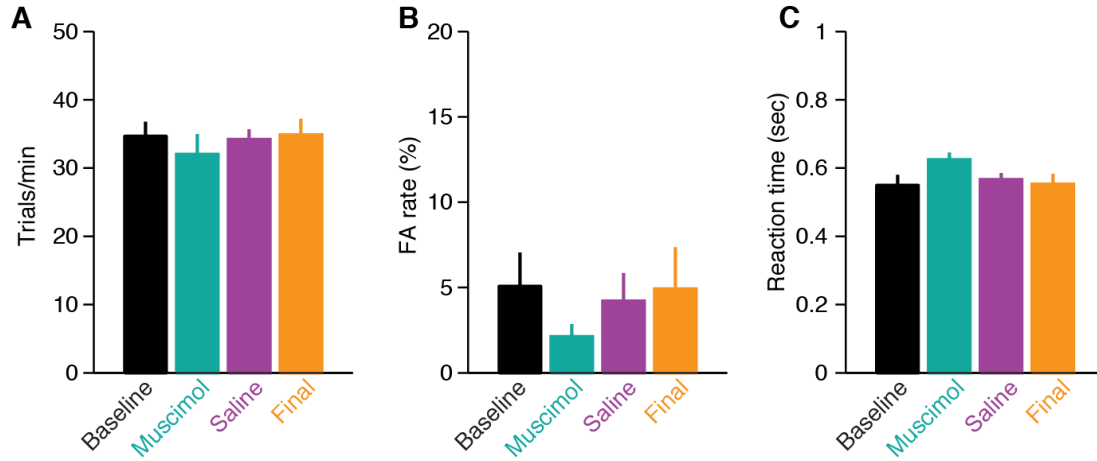

396 **Fig. S12 Muscimol-induced disruption of PL is not explained by task-specific impairments**

397 A low dose of muscimol (0.5 mg/mL, 1 $\mu$ L/hemisphere; total dose of 1  $\mu$ g) does not affect (A)  
 398 the rate of trial completion [ $F_{1,8,9,2} = 0.36$ ,  $P = 0.69$ ], (B) false alarm rates [ $F_{1,2,6,2} = 0.93$ ,  $P =$   
 399 0.39], or (C) hit trial reaction times [ $F_{3,15} = 2.2$ ,  $P = 0.13$ ]. For muscimol and saline conditions,  
 400 across-session means were calculated for each animal. These mean values were then averaged  
 401 across animals to obtain the bars and SEMs depicted here. All  $n = 6$  animals.



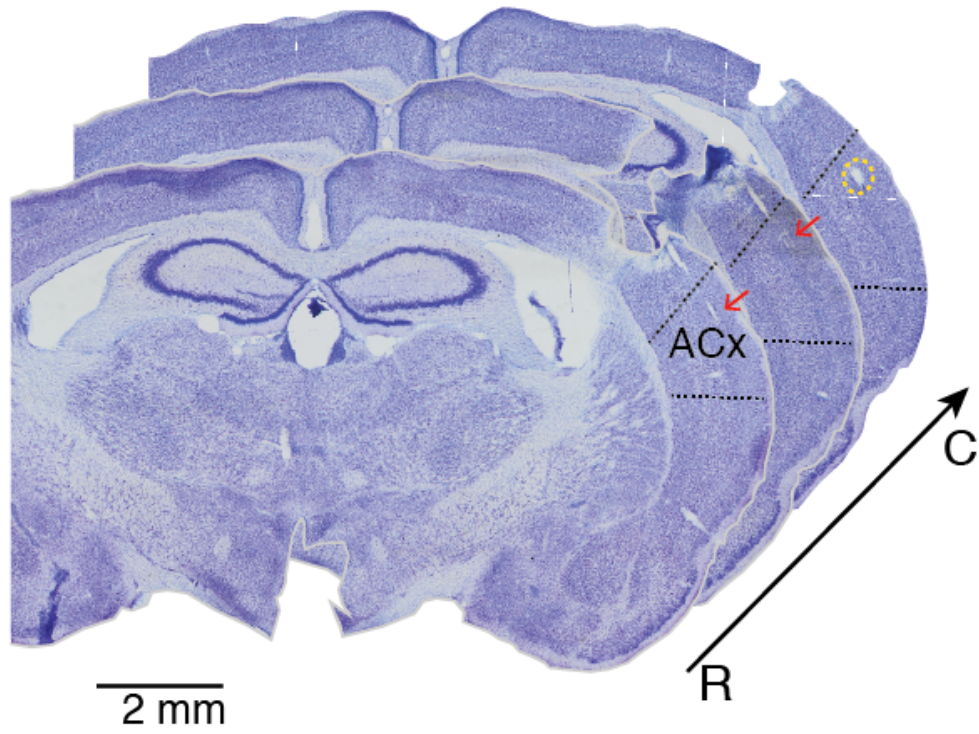

402 **Fig. S13 Representative electrode track**

403 Nissl-stained coronal sections from one animal arranged from rostral (R) to caudal (C) showing  
404 electrode tracks (red arrows) and electrolytic lesion (yellow circle) in ACx. Sections were  
405 separated by 180  $\mu\text{m}$ .

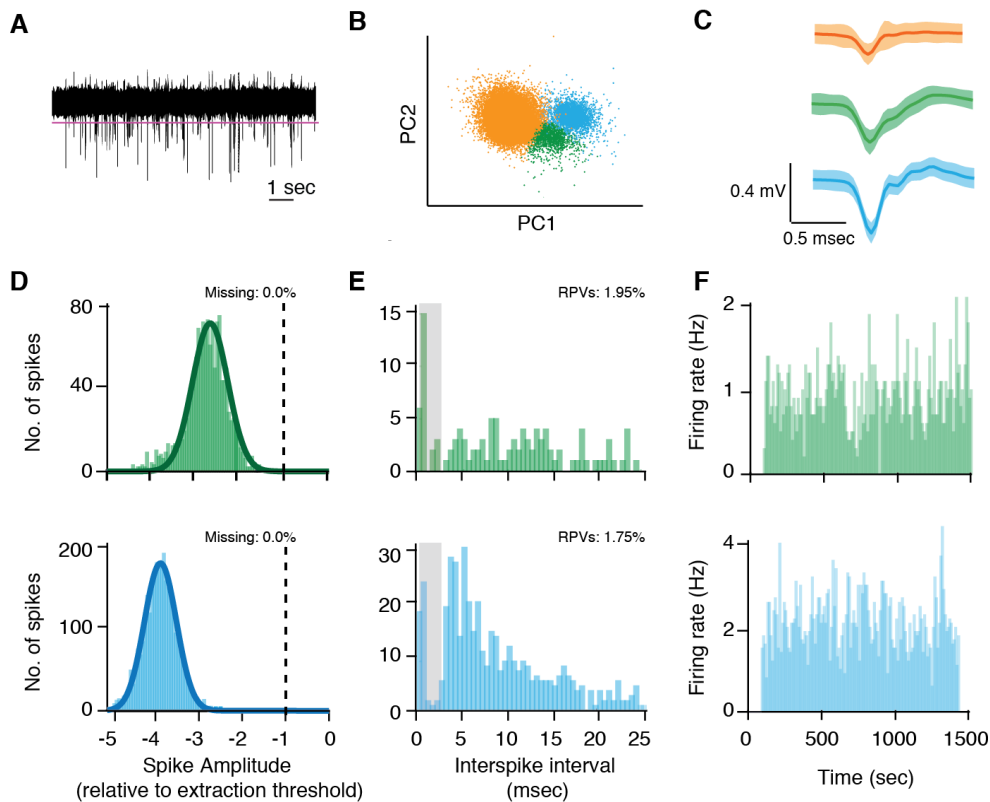

406 **Fig. S14 Spike sorting and single-unit verification**

407 (A) Representative voltage trace after filtering and common average referencing. Magenta line  
 408 indicates snippet extraction threshold. (B) Extracted snippets were sorted in principal component  
 409 (PC) space, generating (C) sorted waveforms (means  $\pm$  2 stdev). (D) Distribution of spike  
 410 amplitudes for the two single-units identified in C. Dashed vertical line represents amplitude of  
 411 extraction threshold. Thick line represents a Gaussian fit of the distribution, allowing for an  
 412 estimation of the percent of spikes missing. (E) Distribution of interspike-intervals for each  
 413 single-unit. Grey shading highlights refractory period. For both units < 2% of spikes were  
 414 refractory period violations (RPVs). (F) Firing rate histograms for each single unit over the  
 415 duration of the recording session. Both units show steady firing rates, demonstrating recording  
 416 stability.

417 **Table S1.**

418 Number of units responsive to AM, broken down by day and by session type.

| <b>Day</b>   | <b>Pre</b>   |               | <b>Engaged</b> |               | <b>Post</b>  |               |
|--------------|--------------|---------------|----------------|---------------|--------------|---------------|
|              | <b>Multi</b> | <b>Single</b> | <b>Multi</b>   | <b>Single</b> | <b>Multi</b> | <b>Single</b> |
| <b>1</b>     | 11           | 0             | 29             | 2             | 11           | 1             |
| <b>2</b>     | 6            | 0             | 32             | 3             | 5            | 0             |
| <b>3</b>     | 11           | 0             | 37             | 2             | 14           | 0             |
| <b>4</b>     | 4            | 0             | 33             | 0             | 7            | 0             |
| <b>5</b>     | 6            | 0             | 29             | 3             | 7            | 0             |
| <b>6</b>     | 2            | 0             | 28             | 1             | 4            | 0             |
| <b>7</b>     | 3            | 1             | 30             | 2             | 6            | 0             |
| <b>Total</b> | <b>43</b>    | <b>1</b>      | <b>218</b>     | <b>13</b>     | <b>54</b>    | <b>1</b>      |

419

420 **Table S2.**

421 Within-animal correlations between behavioral and neural thresholds. AM responses during the  
 422 Pre condition from subject 221955 were only observed on one day, so no correlation value could  
 423 be calculated. \*Significant after adjusting alpha level for multiple comparisons.

424

| Subject ID | Pre      |          |       | Engaged  |          |       | Post     |          |       |
|------------|----------|----------|-------|----------|----------|-------|----------|----------|-------|
|            | <i>r</i> | <i>P</i> | slope | <i>r</i> | <i>P</i> | slope | <i>r</i> | <i>P</i> | slope |
| 217821     | 0.87     | 0.012    | 0.53  | 0.85     | <0.0001* | 0.74  | 0.39     | 0.23     | 0.32  |
| 221955     | --       | --       | --    | 0.99     | 0.0014*  | 1.2   | 0.85     | 0.35     | 2.3   |
| 222724     | 0.87     | 0.052    | 1.6   | 0.61     | 0.14     | 0.93  | 0.65     | 0.16     | 1.7   |
| 222725     | 0.56     | 0.093    | 0.79  | 0.92     | 0.0002*  | 0.81  | 0.63     | 0.051    | 0.75  |

425 **Table S3.**

426 Within-site threshold comparisons during perceptual training (Student’s paired two-tailed *t*-  
 427 tests). Only units that yielded a valid threshold on both days were included in the analyses.  
 428 Because some sites were lost during later sessions, the Day 1 thresholds (and the sample sizes)  
 429 differ for each comparison. Data are from  $n = 2$  animals. (We advanced the electrode in the  
 430 remaining 2 animals throughout Days 1-5, making within-unit comparisons in those subjects  
 431 impossible). \*Significant after adjusting alpha level for multiple comparisons.

| <b>Comparison</b> | <b>Day 1 threshold<br/>(dB re: 100%)<br/>Mean ± SEM</b> | <b>Day N threshold<br/>(dB re: 100%)<br/>Mean ± SEM</b> | <b><i>t</i>(df)</b> | <b><i>P</i></b> | <b>Effect size<br/>(Cohen’s <i>d</i>)</b> |
|-------------------|---------------------------------------------------------|---------------------------------------------------------|---------------------|-----------------|-------------------------------------------|
| Day 1 vs. Day 2   | -7.0 ± 0.91                                             | -9.9 ± 0.81                                             | 5.1(15)             | 0.0001*         | 0.65                                      |
| Day 1 vs. Day 3   | -6.8 ± 0.97                                             | -9.0 ± 0.76                                             | 5.5(15)             | <0.0001*        | 0.84                                      |
| Day 1 vs. Day 4   | -7.4 ± 0.99                                             | -11 ± 0.81                                              | 8.3(13)             | <0.0001*        | 1.2                                       |
| Day 1 vs. Day 5   | -7.5 ± 1.0                                              | -13 ± 1.0                                               | 8.6(11)             | <0.0001*        | 1.5                                       |

432

433 **Table S4.**

434 Chi-square analysis of the effect of listening condition (pre, engaged, post) on unit  
 435 responsiveness to AM, broken down by day. See Table S1 for raw counts of responsive units.

436 \*Significant after adjusting alpha level for multiple comparisons.

| <b>% Units Responsive to AM</b> |            |                |             |                                 |           |                              |
|---------------------------------|------------|----------------|-------------|---------------------------------|-----------|------------------------------|
| <b>Day</b>                      | <b>Pre</b> | <b>Engaged</b> | <b>Post</b> | <b>Pearson <math>X^2</math></b> | <b>df</b> | <b><i>P</i></b>              |
| <b>1</b>                        | 23.9       | 67.4           | 26.1        | 23.2                            | 2         | <0.001*                      |
| <b>2</b>                        | 13.0       | 74.5           | 10.6        | 55.6                            | 2         | <0.001*                      |
| <b>3</b>                        | 20.0       | 69.6           | 25.9        | 34.4                            | 2         | <0.001*                      |
| <b>4</b>                        | 8.50       | 68.8           | 15.2        | 48.3                            | 2         | <0.001*                      |
| <b>5</b>                        | 12.2       | 65.3           | 14.6        | 41.2                            | 2         | <0.001*                      |
| <b>6</b>                        | 5.00       | 70.7           | 10.0        | 53.0                            | 2         | <0.001*                      |
| <b>7</b>                        | 9.30       | 71.1           | 14.0        | 48.2                            | 2         | <0.001 <sup>#37</sup><br>438 |
